# Supplementary material
Source: publisher figshare collection journal article supplement (https://acs.figshare.com/ndownloader/files/21000357)
Supplement: Supplementary file 1 [file 21000357]

## **Supporting Information**

### **Synthesis of temperature/pH dual-stimuli response multicompartamental microcapsules via Pickering emulsion for preprogrammable payload release**

*Yaxin Chen, Wei Wei, Ye Zhu, Jing Luo\*, Ren Liu\* and Xiaoya Liu*

The Key Laboratory of Synthetic and Biological Colloids, Ministry of Education, School of Chemical and Material Engineering, Jiangnan University, Wuxi, Jiangsu 214122, P. R. China

---

\*Corresponding author. Fax: 86-510-85917763; Tel: 86-510-85917763; E-mail: jingluo19801007@126.com.  
E-mail: liuren@jiangnan.edu.cn.

**Table S1:** Specific formula of pNIPAM particles

| sample | MBA(g) | pNIPAM (g) | Crosslinker content ( wt% ) | APS(g) | Deionized water ( mL ) | Observations |
|--------|--------|------------|-----------------------------|--------|------------------------|--------------|
| 1      | 0.0    | 4.0        | 0.0                         | 0.08   | 196                    | /            |
| 2      | 0.1    | 3.9        | 2.5                         | 0.08   | 196                    | Coagula      |
| 3      | 0.2    | 3.8        | 5.0                         | 0.08   | 196                    | Stable latex |
| 4      | 0.3    | 3.7        | 7.5                         | 0.08   | 196                    | Stable latex |
| 5      | 0.4    | 3.6        | 10.0                        | 0.08   | 196                    | Stable latex |
| 6      | 0.5    | 3.5        | 12.5                        | 0.08   | 196                    | Coagula      |

**NOTE:** 1 sample as comparison

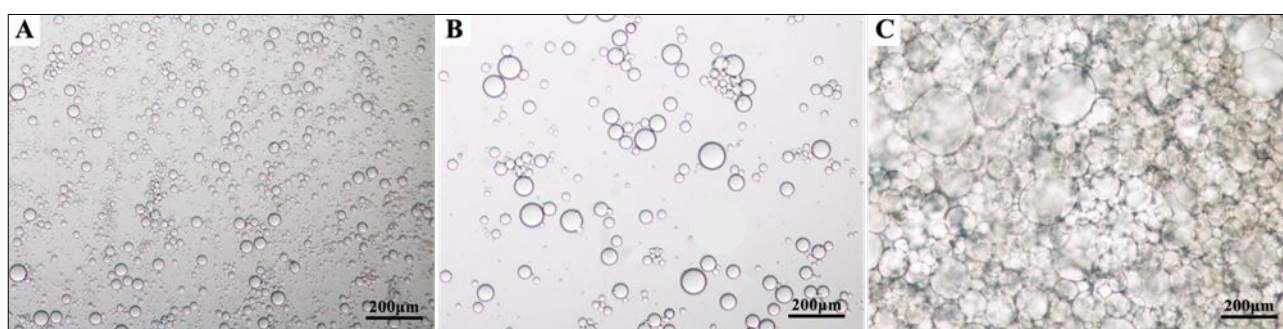

**Figure S1** pNIPAM@NR particles stabilized emulsion with crosslinker content of 5 wt% (A), 7.5 wt% (B), and 10 wt% (C), respectively

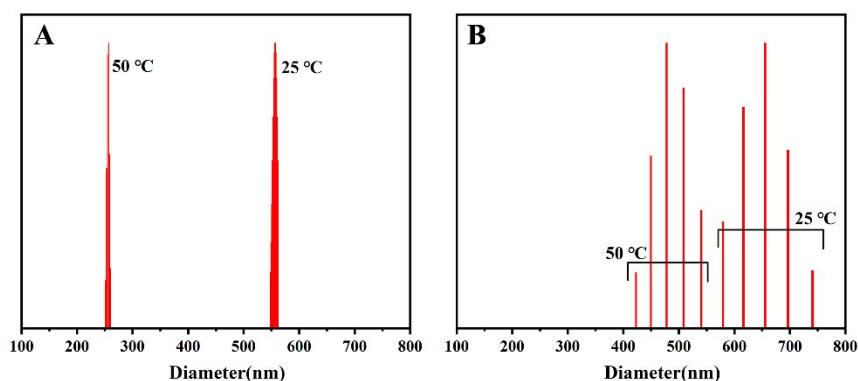

**Figure S2** The particle size and distribution of pNIPAM particles (A) and pNIPAM@NR particles (B) at 25°C and 50°C.

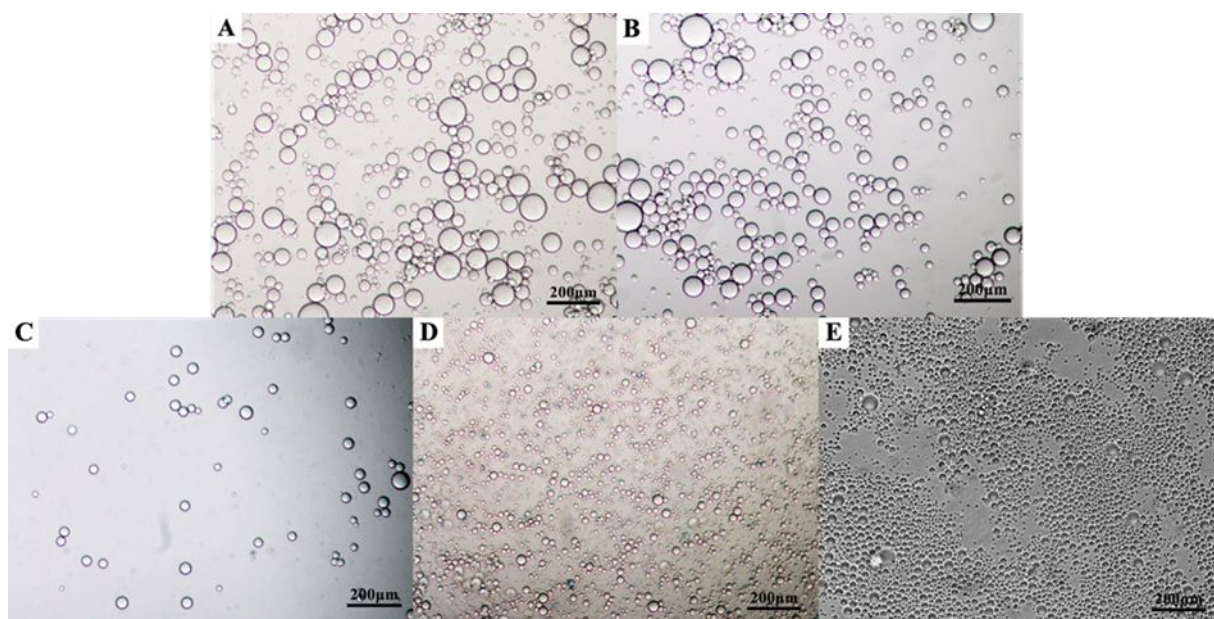

**Figure S3** Emulsion with oil to water ratio of 1:2 at different emulsifier concentrations: 2 mg/mL (A), 4 mg/mL (B), 8 mg/mL (C), 16 mg/mL (D), 32 mg/mL (E).

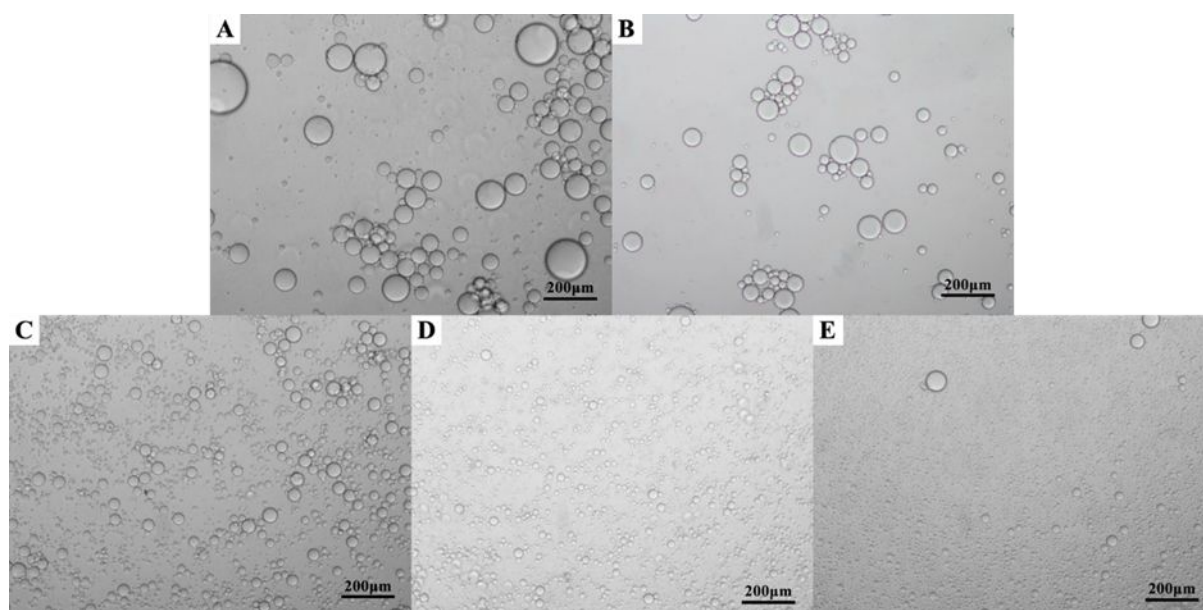

**Figure S4** Emulsion with emulsifier concentration of 16 mg/mL at different oil/water ratio: 4:1 (A), 2:1 (B), 1:1 (C), 1:2 (D), 1:4 (E).

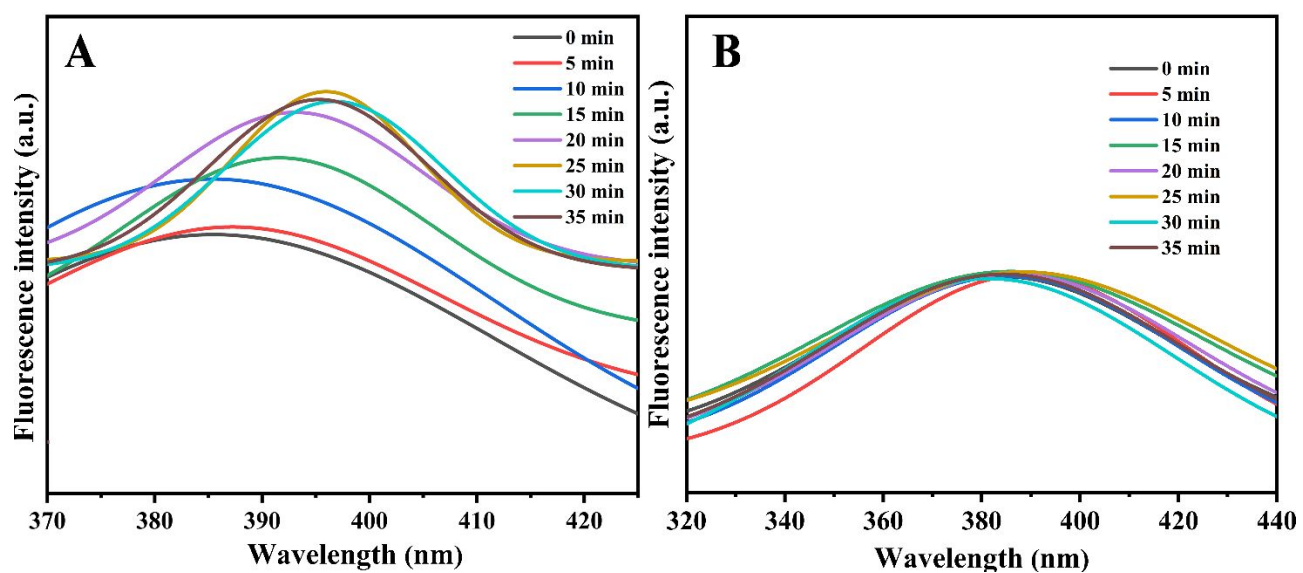

**Figure S5** pH-induced release of OG from the microcapsule interior was measured by fluorescent intensity change of dialysis bath at pH=3 (A) and pH=9 (B).
